# Supplementary material for: Effectiveness of Hydrotherapy on Neuropathic Pain and Pain Catastrophization in Patients With Spinal Cord Injury: Protocol for a Pilot Trial Study
Source: PubMed Central journal article supplement (PMC9107053; doi:10.2196/37255), 2022-04-29
Supplement: resprot_v11i4e37255_app12.pdf [file resprot_v11i4e37255_app12.pdf]

## FORMATO DE EVALUACIÓN DE PROPUESTAS DE INVESTIGACIÓN

### **Datos generales del Proyecto:**

#### **Título del proyecto:**

EFFECTIVIDAD DE LA HIDROTERAPIA PARA DISMINUCIÓN DE INTENSIDAD Y CATASTROFIZACIÓN DE DOLOR NEUROPÁTICO EN PACIENTES CON TRAUMA RAQUIMEDULAR

#### **Investigador Principal:**

MARIA ANA TOVAR SANCHEZ ,

#### **Coinvestigadores:**

GLORIA PATRICIA ARANGO HOYOS , SARA GABRIELA PACICHANA QUINAYÁZ ,

#### **Facultad o Instituto académico:**

SALUD

#### **Unidad Académica:**

MEDICINA FISICA Y REHABILITACION ,

### 1. Justificación de la propuesta

#### **1. 1 Justificación y pertinencia**

¿Se argumenta la naturaleza y magnitud del problema de tal forma que es clara la importancia científica y tecnológica de la investigación en la producción del conocimiento? ¿Es relevante, adecuada y oportuna en términos de su contribución al desarrollo de la región y del país y/o a la consolidación de la comunidad científica o artística?

Es una propuesta pertinente con importancia en el ámbito local

### 2. Concordancia y calidad de los planteamientos

#### **2. 1 Pregunta o problema de investigación**

¿La pregunta o problema de investigación está formulado de manera adecuada y precisa?

La pregunta se formula de manera adecuada

## **2. 2 Objetivo general y objetivos específicos**

¿Los objetivos son claros y coherentes con el planteamiento del problema o pregunta de investigación?

Los objetivos son claros, sin embargo el primer objetivo es una actividad que siempre debe realizarse en una investigación y que por lo tanto algunos consideran no es necesario incluirla, por que no ayuda a responder la pregunta que se esta planteando

## **2. 3 Metodología**

¿La propuesta plantea una metodología clara, coherente y factible con el problema y presenta en forma organizada y precisa, cómo se alcanzará cada uno de los objetivos propuestos?

La metodología es clara y pertinente

## **2. 4 Marco teórico y estado del arte**

¿Se presenta un marco teórico bien construido acompañado de una síntesis del contexto general (nacional y/o mundial) en el cual se ubica el tema de la propuesta: estado actual, vacíos a llenar, etc.?

se identifican vacíos de conocimiento

## **2. 5 Concordancia**

¿Existe concordancia entre la pregunta o problema de investigación, los objetivos y la metodología propuesta?

si existe concordancia

## **3. Productos**

### **3. 1 Productos esperados**

¿Los resultados describen los productos teóricos o prácticos, bienes o servicios que se pueden lograr con la realización del proyecto?

Los productos esperados son realizables

### **3. 2 Estrategias de divulgación**

¿Explicita el compromiso de publicación científica y de divulgación a través de estrategias concretas?

Se especifican los productos esperados y estos son acordes con el desarrollo del proyecto

## **4. Impactos**

### **4. 1 Se evidencian impactos que se generen con el proyecto a corto, mediano y largo plazo?**

Se evidencian impactos que se generen con el proyecto a corto, mediano y largo plazo?

Se describen de manera adecuada los impactos del proyecto y los plazos en los que se espera se presenten

## TABLA DE CALIFICACIÓN DE CRITERIOS ESPECIFICOS PARA EVALUACIÓN DE PROYECTOS DE INVESTIGACIÓN

Escala de calificación: 1 a 5, utilizando dos decimales (5=máxima calificación)

| Criterio                                  | Nota por criterio | Ponderación (100%) | Nota ponderada |
|-------------------------------------------|-------------------|--------------------|----------------|
| Impacto                                   | 4.50              | 10%                | 0.45           |
| Justificación y pertinencia               | 4.45              | 15%                | 0.67           |
| Marco teórico y aporte al estado del arte | 4.45              | 15%                | 0.67           |
| Métodos                                   | 4.50              | 20%                | 0.90           |
| Objetivos                                 | 4.20              | 20%                | 0.84           |
| Pregunta o problema de investigación      | 4.60              | 20%                | 0.92           |
| <b>Total</b>                              |                   | <b>100%</b>        | <b>4.45</b>    |

(1) Los valores definidos en la columna de ponderación fueron establecidos por el Comité Central de Investigaciones por lo tanto no son susceptibles de modificación en la evaluación.

**LOS SIGUIENTES APARTES DEBERÁN SER EVALUADOS SOLO EN CASO DE QUE SE REQUIERA MEDIANTE LA CARTA DE SOLICITUD DE EVALUACIÓN.**

### 1. Cronograma

¿La secuencia de actividades y tiempo previsto para su realización son adecuados para alcanzar los resultados esperados?

La secuencia de actividades esta descrita de forma adecuada

### 2. Presupuesto

Existe concordancia entre el presupuesto total, las actividades, los objetivos y resultados planteados del proyecto? ¿Muestra justificación adecuada de los rubros, cantidades y montos solicitados con los objetivos, la metodología y la duración del proyecto?

No aplica

### 3. Permisos, licencias o contratos

¿El proyecto requiere permisos, licencias o contratos en el marco de la normativa ambiental nacional vigente relacionada con los proyectos de investigación en áreas de las ciencias biológicas, agrarias, ambientales y biomédicas?

No

## CALIFICACIÓN DE OTROS CRITERIOS PARA EVALUACIÓN DE PROYECTOS DE INVESTIGACIÓN

Escala de calificación: 1 a 5, utilizando dos decimales (5=máxima calificación)

|                                 |     |
|---------------------------------|-----|
| Cronograma                      | 4.5 |
| Presupuesto                     | 5   |
| Permisos, licencias o contratos | 5   |

### Recomendación final

Es un proyecto adecuadamente formulado, con potencial de generar impacto en el área del conocimiento

APRUEBA \_\_\_\_\_ NO APRUEBA \_\_\_\_\_ REQUIERE MODIFICACIONES \_\_\_\_\_

**Evaluador No. 1**  
Nombre del evaluador

**Firma**

**Fecha: (DD/MM/AA): 10/09/2018**
